# Supplementary material for: The Complete Chloroplast Genome Sequence of a Relict Conifer Glyptostrobus pensilis: Comparative Analysis and Insights into Dynamics of Chloroplast Genome Rearrangement in Cupressophytes and Pinaceae
Source: PubMed Central journal article supplement (PMC4999192; doi:10.1371/journal.pone.0161809), 2016-08-25
Supplement: pone.0161809.s001.pdf [file pone.0161809.s001.pdf]

**S1 Data. Matrices of LCBs (locally co-linear blocks) for computing multiple cp genome rearrangement scenarios.**

----- cupressophytes -----

>Cryptomeria japonica

1,2,3,7,6,5,4,8,24,26,21,20,19,23,25,13,17,18,16,15,14,12,11,10,9,22\$

>Glyptostrobus pensilis

1,2,3,-4,-5,-6,-7,8,24,26,21,20,19,-18,-17,-13,-25,-23,16,15,14,12,11,10,9,22\$

>Cunninghamia lanceolata

1,2,3,7,6,5,4,20,19,-18,-17,-13,-14,-15,-16,23,25,24,26,21,8,12,11,10,9,22\$

>Taiwania flousiana

1,2,3,7,6,5,4,8,24,26,21,20,19,-18,-17,-13,-14,-15,-16,23,25,12,11,10,9,22\$

>Taiwania cryptomerioides

1,2,3,7,6,5,4,8,24,26,21,20,19,-18,-17,-13,-14,-15,-16,23,25,12,11,10,9,22\$

>Metasequoia glyptostroboides

1,2,3,-4,-5,-6,-7,8,24,26,21,20,19,-18,-17,-13,-14,-15,-16,23,25,12,11,10,9,22\$

>Taxus mairei

1,2,3,7,-6,5,4,8,-9,-10,-11,-12,-17,-13,-14,-15,-16,18,19,-20,-21,-26,25,24,-23,22\$

>Araucaria heterophylla

1,2,3,-4,-5,-6,-7,8,-9,-10,-11,-12,-13,-14,15,-16,17,18,23,-24,-25,26,21,20,-19,22\$

>Agathis dammara

1,2,3,-4,-5,-6,-7,8,-9,-10,-11,-12,-13,-14,15,-16,17,18,23,-24,-25,26,21,20,-19,22\$

>Retrophyllum piresii

1,2,3,-4,-21,-26,25,24,-23,17,18,16,15,14,13,12,11,10,9,-8,7,6,5,20,-19,22\$

>Podocarpus lambertii

1,2,3,-4,-5,-6,-7,8,-9,-10,-11,-12,-13,-14,-15,-16,-18,-17,23,-24,-25,26,21,20,-19,22\$

>Nageia nagi

1,2,3,-4,-5,-6,-7,8,-9,-10,-11,-12,-13,-14,-15,-16,-18,-17,23,-24,-25,26,21,20,-19,22\$

>Amentotaxus formosana

1,2,3,-4,-5,-6,-7,8,-9,-10,-11,-12,16,15,14,13,17,18,19,-20,-21,-26,25,24,-23,22\$

>Cephalotaxus wilsoniana

1,-22,23,-24,-25,26,21,20,-19,-18,-17,-13,-14,-15,-16,12,3,-4,-5,-6,-7,8,-9,-10,-11,-2\$

>Cephalotaxus oliveri

1,-22,23,-24,-25,26,21,20,-19,-18,-17,-13,-14,-15,-16,12,3,-4,-5,-6,-7,8,-9,-10,-11,-2\$

>Juniperus scopulorum

1,2,3,7,6,5,4,8,24,26,21,20,19,23,-25,16,15,14,13,17,18,12,11,10,9,22\$

>Juniperus bermudiana

1,2,3,7,6,5,4,8,24,26,21,20,19,23,-25,16,15,14,13,17,18,12,11,10,9,22\$

>Calocedrus formosana

1,2,3,7,6,5,4,8,24,26,21,20,19,23,-25,16,15,14,13,17,18,12,11,10,9,22\$

>Juniperus virginiana

1,2,3,-4,-5,-6,-7,8,24,26,21,20,19,23,-25,16,15,14,13,17,18,12,11,10,9,22\$

>Juniperus monosperma

1,2,3,-4,-5,-6,-7,8,24,26,21,20,19,23,-25,16,15,14,13,17,18,12,11,10,9,22\$

>Hesperocyparis glabra

1,2,3,-4,-5,-6,-7,8,24,26,21,20,19,23,-25,16,15,14,13,17,18,12,11,10,9,22\$

>Cupressus sempervirens

1,2,3,-4,-5,-6,-7,8,24,26,21,20,19,23,-25,16,15,14,13,17,18,12,11,10,9,22\$

>Callitropsis vietnamensis

1,2,3,-4,-5,-6,-7,8,24,26,21,20,19,23,-25,16,15,14,13,17,18,12,11,10,9,22\$

>Callitropsis nootkatensis

1,2,3,-4,-5,-6,-7,8,24,26,21,20,19,23,-25,16,15,14,13,17,18,12,11,10,9,22\$

>Ginkgo biloba (-IRA)

1,2,3,-4,-5,-6,-7,8,-9,10,-11,-12,-13,-14,-15,-16,17,18,19,-20,-21,-22,23,-24,-25,26\$

----- Pinaceae -----

>Larix decidua

1,4,2,5,3,7,6\$

>Abies koreana

1,-4,2,5,3,7,6\$

>Pice abies

1,-4,2,5,3,7,6\$

>Pseudotsuga sinensis

1,-4,2,5,3,7,6\$

>Cathaya argyrophylla

1,-2,4,5,3,7,6\$

>Cedrus deodara

1,-2,4,5,3,7,6\$

>Keteleeria davidiana

1,-2,4,5,3,7,6\$

>Picea morrisonicoia

1,-2,4,5,3,7,6\$

>Pinus koraiensis

1,-2,-4,5,3,7,6\$

>Pinus massoniana

1,-2,-4,5,3,7,6\$

>Pinus strobus

1,-2,-4,5,3,7,6\$

>Pinus taeda

1,-2,-4,5,3,7,6\$

>Pinus thunbergii

1,-2,-4,5,3,7,6\$

>Ginkgo biloba (-IRB)

1,-2,-3,4,5,6,-7\$
